# Supplementary material
Source: PubMed Central journal article supplement (PMC4292467)
Supplement: AEM.03517-14_zam999105994so1.pdf [file AEM.03517-14_zam999105994so1.pdf]

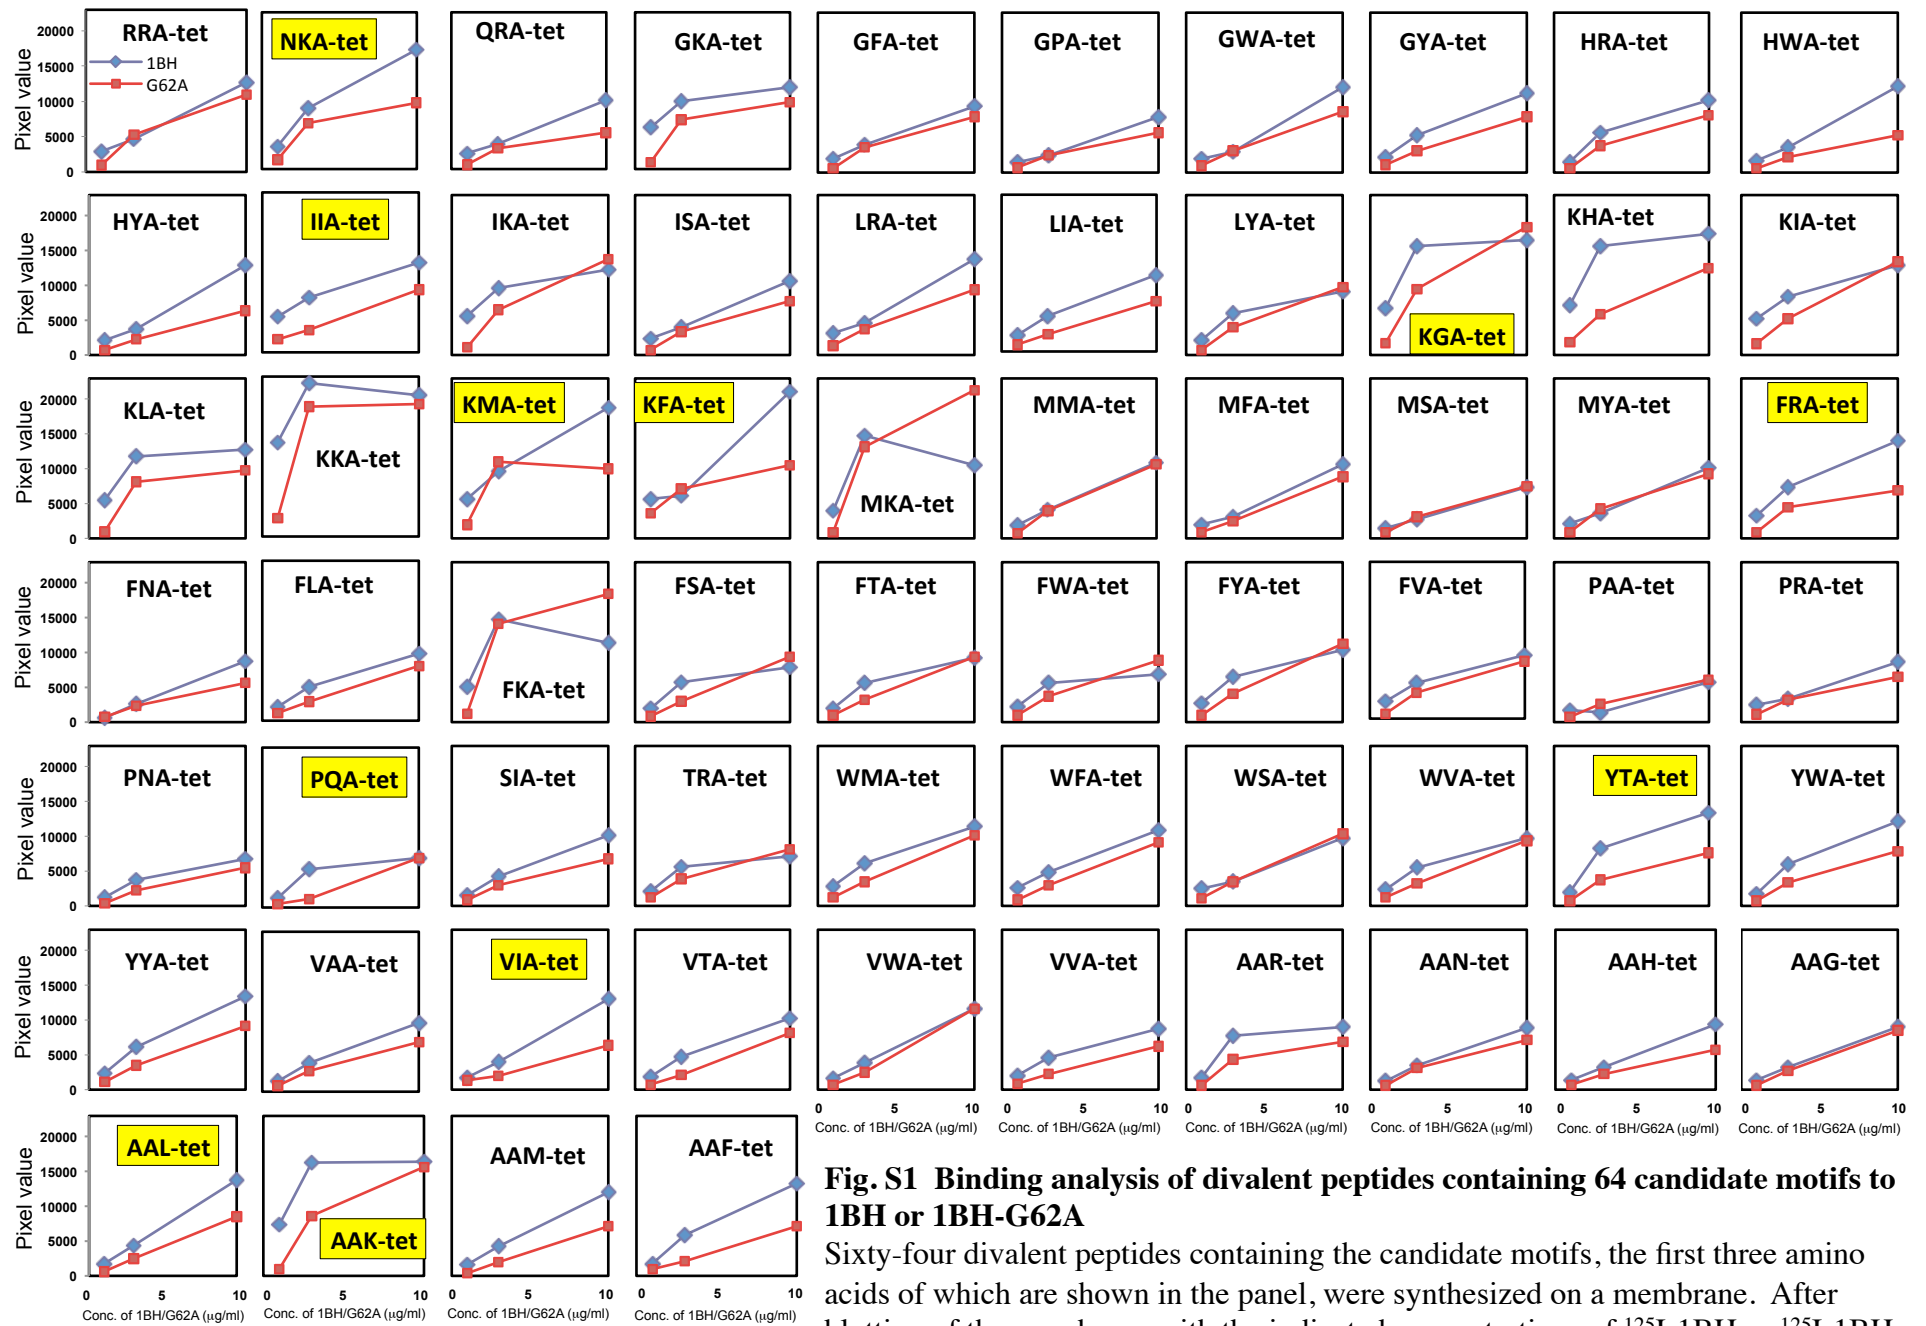

**Fig. S1 Binding analysis of divalent peptides containing 64 candidate motifs to 1BH or 1BH-G62A**  
 Sixty-four divalent peptides containing the candidate motifs, the first three amino acids of which are shown in the panel, were synthesized on a membrane. After blotting of the membrane with the indicated concentrations of  $^{125}\text{I}$ -1BH or  $^{125}\text{I}$ -1BH-G62A (Fig. 4A), the radioactivity bound to each peptide spot was quantitated as a pixel value and analyzed.

**Table S1 Analysis of the binding of divalent peptides synthesized on a membrane with  $^{125}\text{I}$ -1BH or  $^{125}\text{I}$ -1BH-G62A**

The radioactivity of  $^{125}\text{I}$ -1BH or  $^{125}\text{I}$ -1BH-G62A bound to each peptide spot (Fig. 3B) was quantitated as a pixel value. The sum of the pixel value of each peptide was normalized to 380 (the number of divalent peptides synthesized on a membrane) so that each peptide would have a value of 1 in the absence of selectivity. The ratio (1BH/G62A ratio) of the normalized value of  $^{125}\text{I}$ -1BH binding (1BH-binding value) to that of  $^{125}\text{I}$ -1BH-G62A binding (G62A-binding value) was calculated, and the sum of each ratio was also normalized to 380 to evaluate the specificity of binding through G62. The product (1BH  $\times$  ratio) of the 1BH-binding value and the normalized 1BH/G62A ratio was used to evaluate both the binding intensity and specificity. Divalent peptides with 1BH-binding values greater than 1.14 were selected (110 peptides) and then re-sorted in descending order of 1BH  $\times$  ratio. The gray boxes indicate the 64 candidate motifs that were selected after the binding analysis.

| order     | XXX | 1BH-binding<br>value | G62A-binding<br>value | 1BH/G62A<br>ratio | 1BH × ratio |
|-----------|-----|----------------------|-----------------------|-------------------|-------------|
| 1         | KLA | 3.68                 | 2.07                  | 1.77              | 6.52        |
| 2         | PRA | 2.19                 | 0.85                  | 2.58              | 5.65        |
| 3         | AAN | 1.41                 | 0.44                  | 3.21              | 4.54        |
| 4         | KKA | 5.48                 | 6.84                  | 0.80              | 4.39        |
| 5         | GPA | 1.18                 | 0.33                  | 3.62              | 4.29        |
| 6         | KIA | 2.26                 | 1.35                  | 1.68              | 3.79        |
| 7         | VWA | 1.65                 | 0.75                  | 2.21              | 3.65        |
| <b>8</b>  | AAK | 2.16                 | 1.29                  | 1.67              | 3.61        |
| 9         | VTA | 1.41                 | 0.57                  | 2.47              | 3.48        |
| 10        | AAH | 1.55                 | 0.80                  | 1.94              | 3.00        |
| 11        | LIA | 1.45                 | 0.73                  | 1.98              | 2.86        |
| 12        | AAM | 1.29                 | 0.60                  | 2.13              | 2.74        |
| <b>13</b> | KGA | 1.83                 | 1.25                  | 1.46              | 2.67        |
| 14        | WFA | 1.82                 | 1.25                  | 1.46              | 2.64        |
| 15        | MKA | 1.69                 | 1.09                  | 1.55              | 2.62        |
| 16        | FKA | 2.38                 | 2.21                  | 1.08              | 2.56        |
| <b>17</b> | KFA | 2.24                 | 2.00                  | 1.12              | 2.50        |
| 18        | AAR | 1.34                 | 0.73                  | 1.84              | 2.46        |
| 19        | FVA | 1.39                 | 0.81                  | 1.72              | 2.39        |
| 20        | AAF | 1.33                 | 0.75                  | 1.77              | 2.35        |
| 21        | AAG | 1.22                 | 0.66                  | 1.86              | 2.27        |
| <b>22</b> | FRA | 1.81                 | 1.45                  | 1.25              | 2.26        |
| 23        | PNA | 1.40                 | 0.87                  | 1.61              | 2.25        |
| 24        | TRA | 1.85                 | 1.53                  | 1.21              | 2.25        |
| 25        | FSA | 1.32                 | 0.78                  | 1.69              | 2.23        |
| 26        | FYA | 1.63                 | 1.21                  | 1.34              | 2.19        |
| 27        | KRR | 1.63                 | 1.23                  | 1.32              | 2.15        |
| <b>28</b> | KMA | 2.29                 | 2.47                  | 0.93              | 2.13        |
| 29        | LYA | 1.86                 | 1.63                  | 1.14              | 2.12        |
| 30        | MSA | 1.23                 | 0.73                  | 1.69              | 2.09        |
| 31        | MFA | 1.20                 | 0.70                  | 1.73              | 2.08        |
| 32        | WVA | 1.42                 | 0.99                  | 1.44              | 2.05        |
| 33        | WMA | 1.61                 | 1.26                  | 1.27              | 2.05        |
| 34        | GKA | 2.30                 | 2.64                  | 0.87              | 2.00        |
| 35        | MYA | 1.22                 | 0.76                  | 1.62              | 1.98        |
| 36        | MMA | 1.17                 | 0.70                  | 1.67              | 1.97        |
| 37        | IKA | 1.65                 | 1.40                  | 1.18              | 1.95        |
| 38        | FNA | 1.36                 | 0.94                  | 1.44              | 1.95        |
| 39        | FWA | 1.53                 | 1.20                  | 1.27              | 1.94        |
| 40        | PAA | 1.18                 | 0.73                  | 1.61              | 1.91        |
| <b>41</b> | IIA | 1.21                 | 0.77                  | 1.58              | 1.90        |
| 42        | YWA | 1.67                 | 1.47                  | 1.14              | 1.90        |
| 43        | RRA | 1.41                 | 1.05                  | 1.34              | 1.89        |
| 44        | VVA | 1.15                 | 0.73                  | 1.58              | 1.82        |
| 45        | FTA | 1.33                 | 0.99                  | 1.35              | 1.79        |
| 46        | SIA | 1.43                 | 1.18                  | 1.22              | 1.74        |
| 47        | GFA | 1.41                 | 1.16                  | 1.22              | 1.73        |
| <b>48</b> | YTA | 1.26                 | 0.93                  | 1.35              | 1.70        |
| 49        | VAA | 1.19                 | 0.83                  | 1.43              | 1.69        |
| <b>50</b> | PQA | 1.14                 | 0.77                  | 1.49              | 1.69        |
| <b>51</b> | NKA | 1.40                 | 1.16                  | 1.21              | 1.68        |
| 52        | QRA | 1.52                 | 1.37                  | 1.11              | 1.68        |
| <b>53</b> | AAL | 1.28                 | 0.99                  | 1.30              | 1.67        |
| 54        | LRA | 1.48                 | 1.31                  | 1.13              | 1.66        |

|     |     |      |      |      |      |
|-----|-----|------|------|------|------|
| 55  | VHA | 1.15 | 0.80 | 1.44 | 1.65 |
| 56  | KHA | 1.38 | 1.15 | 1.19 | 1.64 |
| 57  | GYA | 1.25 | 0.97 | 1.30 | 1.62 |
| 58  | VIA | 1.16 | 0.83 | 1.40 | 1.62 |
| 59  | YVA | 1.17 | 0.86 | 1.37 | 1.60 |
| 60  | ISA | 1.25 | 0.99 | 1.27 | 1.60 |
| 61  | PGA | 1.17 | 0.88 | 1.34 | 1.57 |
| 62  | GWA | 1.32 | 1.12 | 1.18 | 1.56 |
| 63  | FLA | 1.38 | 1.26 | 1.10 | 1.52 |
| 64  | HYA | 1.28 | 1.08 | 1.18 | 1.51 |
| 65  | YYA | 1.28 | 1.11 | 1.15 | 1.48 |
| 66  | HRA | 1.30 | 1.16 | 1.12 | 1.46 |
| 67  | NWA | 1.24 | 1.08 | 1.15 | 1.42 |
| 68  | KSA | 1.66 | 1.96 | 0.85 | 1.40 |
| 69  | VFA | 1.16 | 0.98 | 1.18 | 1.38 |
| 70  | WQA | 1.24 | 1.12 | 1.11 | 1.37 |
| 71  | WKA | 1.69 | 2.11 | 0.80 | 1.35 |
| 72  | IQA | 1.21 | 1.10 | 1.10 | 1.34 |
| 73  | HWA | 1.25 | 1.17 | 1.07 | 1.33 |
| 74  | WSA | 1.28 | 1.23 | 1.04 | 1.33 |
| 75  | FIA | 1.19 | 1.08 | 1.10 | 1.31 |
| 76  | AKA | 1.33 | 1.42 | 0.94 | 1.25 |
| 77  | IYA | 1.21 | 1.19 | 1.02 | 1.24 |
| 78  | QKA | 1.26 | 1.31 | 0.97 | 1.22 |
| 79  | PHA | 1.23 | 1.25 | 0.99 | 1.21 |
| 80  | MQA | 1.14 | 1.08 | 1.05 | 1.20 |
| 81  | GMA | 1.13 | 1.08 | 1.05 | 1.19 |
| 82  | SRA | 1.21 | 1.24 | 0.97 | 1.18 |
| 83  | VRA | 1.21 | 1.24 | 0.97 | 1.18 |
| 84  | QWA | 1.46 | 1.84 | 0.79 | 1.15 |
| 85  | YKA | 1.58 | 2.18 | 0.73 | 1.15 |
| 86  | SHA | 1.18 | 1.22 | 0.97 | 1.14 |
| 87  | LKA | 1.55 | 2.17 | 0.71 | 1.11 |
| 88  | WYA | 1.34 | 1.66 | 0.81 | 1.08 |
| 89  | FFA | 1.28 | 1.60 | 0.80 | 1.02 |
| 90  | WTA | 1.16 | 1.32 | 0.88 | 1.01 |
| 91  | WWA | 1.37 | 1.89 | 0.73 | 1.00 |
| 92  | IFA | 1.49 | 2.22 | 0.67 | 0.99 |
| 93  | AAI | 1.28 | 1.66 | 0.77 | 0.98 |
| 94  | KYA | 1.51 | 2.38 | 0.63 | 0.96 |
| 95  | WGA | 1.15 | 1.39 | 0.83 | 0.95 |
| 96  | RFA | 1.18 | 1.50 | 0.79 | 0.93 |
| 97  | YRA | 1.21 | 1.57 | 0.77 | 0.93 |
| 98  | MRA | 1.14 | 1.43 | 0.80 | 0.91 |
| 99  | KA  | 1.34 | 2.01 | 0.67 | 0.89 |
| 100 | KTA | 1.53 | 2.67 | 0.57 | 0.87 |
| 101 | FGA | 1.18 | 1.66 | 0.71 | 0.84 |
| 102 | KRA | 1.60 | 3.20 | 0.50 | 0.80 |
| 103 | RKA | 1.56 | 3.09 | 0.51 | 0.79 |
| 104 | KVA | 1.47 | 2.77 | 0.53 | 0.78 |
| 105 | KNA | 1.20 | 1.85 | 0.65 | 0.78 |
| 106 | KPA | 1.29 | 2.18 | 0.59 | 0.76 |
| 107 | PKA | 1.34 | 2.50 | 0.54 | 0.72 |
| 108 | KWA | 1.42 | 3.04 | 0.47 | 0.66 |
| 109 | KQA | 1.20 | 2.37 | 0.50 | 0.60 |
| 110 | SKA | 1.32 | 2.99 | 0.44 | 0.58 |
